# Supplementary material for: Human brain organoid-on-a-chip to model prenatal nicotine exposure
Source: Royal Society of Chemistry journal article supplement (doi:10.1039/c7lc01084b), 2018-01-01
Supplement: c7lc01084b1.pdf [file c7lc01084b1.pdf]

## Supplementary information

### Human brain organoid-on-a-chip to model prenatal nicotine exposure

Yaqing Wang<sup>a,c,d</sup>, Li Wang<sup>a,d</sup>, Yujuan Zhu<sup>a,c,d</sup>, and Jianhua Qin<sup>a,b,c</sup>\*

<sup>a</sup> Division of Biotechnology, Dalian Institute of Chemical Physics, Chinese Academy of Sciences, Dalian 116023, China.

<sup>b</sup> Center for Excellence in Brain Science and Intelligence Technology, Chinese Academy of Sciences, Shanghai 200031, China.

<sup>c</sup> University of Chinese Academy of Sciences, Beijing 100049, China.

<sup>d</sup> Key Laboratory of Separation Sciences for Analytical Chemistry, Dalian Institute of Chemical Physics, Chinese Academy of Sciences, Dalian 116023, China.

\*Correspondence: Jianhua Qin, Division of Biotechnology, Dalian Institute of Chemical Physics, Chinese Academy of Sciences, 457 Zhongshan Road, Dalian 116023, China. E-mail: jhqin@dicp.ac.cn. Fax: 86-411-84379059

The authors have no conflicts of interest to declare.

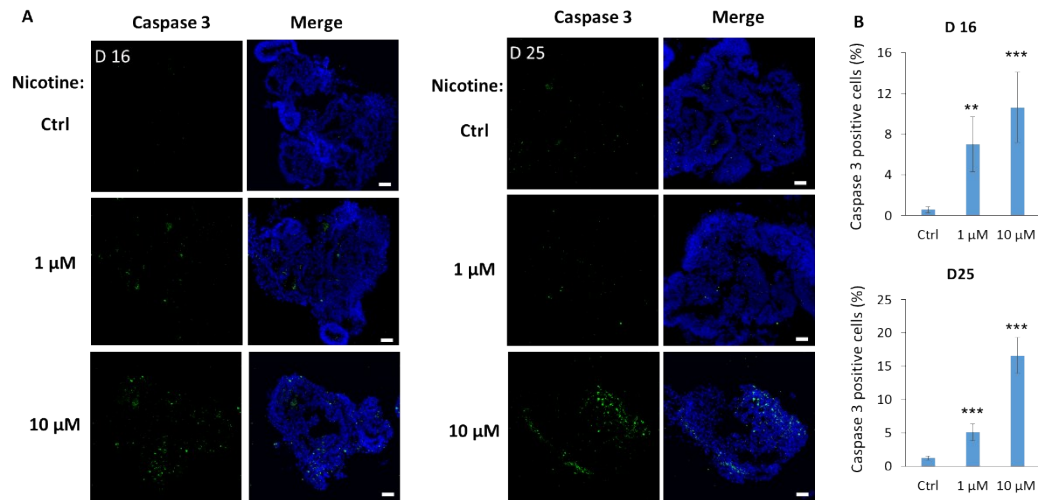

**Fig. S1 Assessment of the cell apoptosis in brain organoids after nicotine exposure under different conditions.** (A) The apoptosis cells were identified by immunohistochemical staining for active Caspase 3 in brain organoids treated with and without nicotine (1  $\mu$ M and 10  $\mu$ M) on day 16 and day 25. DAPI marks nuclei (blue). Scale bars, 50  $\mu$ m. (B) The percentage of Caspase 3 positive cells were quantified by Image Pro Plus 6.0 software. The data represent means of 6 replicates  $\pm$  SD. \*\* $p$  < 0.01, \*\*\* $p$  < 0.001, Student's  $t$ -test.

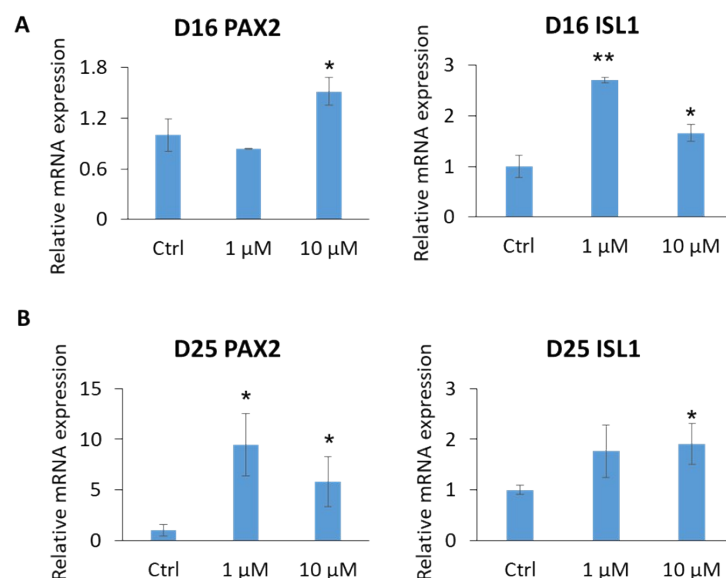

**Fig. S2 Examination of the expression of hindbrain markers (PAX2, ISL1) in nicotine-exposed brain organoids by real-time PCR.** (A-B) Expression of PAX2 and ISL1 in brain organoids in the presence or absence of nicotine on day 16 (A) and day

25 (B). The data shown are fold changes of genes expression in brain organoids with nicotine treatment versus that without nicotine treatment. The  $\beta$ -actin expression was used for normalization. Data are mean  $\pm$  SD. Student's *t*-test, \* $p < 0.05$ , \*\*  $p < 0.01$ , \*\*\*  $p < 0.001$ .
